# Supplementary material for: Development of an MIP based electrochemical sensor for TGF-β1 detection and its application in liquid biopsy
Source: Royal Society of Chemistry journal article supplement (doi:10.1039/d3an00958k), 2023-01-01

## SUPPORTING INFORMATION

**Figure S1.** Image depicting the interdigitates electrodes used for the MIP sensor fabrication. Interdigitates electrodes are composed of two interdigitates electrodes with two connection tracks, made of same material (Pt), on a glass substrate. The dimension of gap is 10  $\mu\text{m}$ .

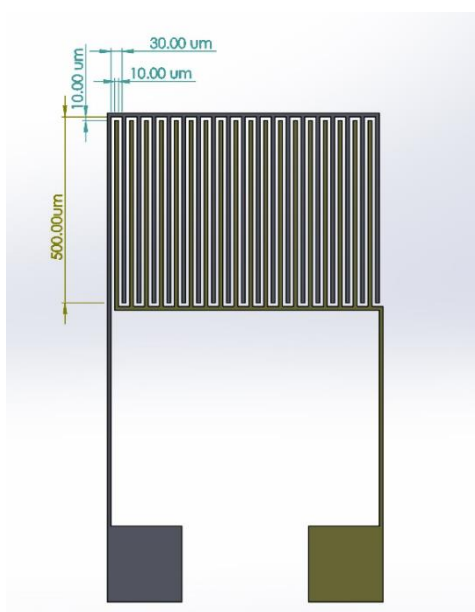

**Figure S2.** DPV characterization of MIP before washing (red line) and MIP after template removal (blue line) with acetic acid 5%.

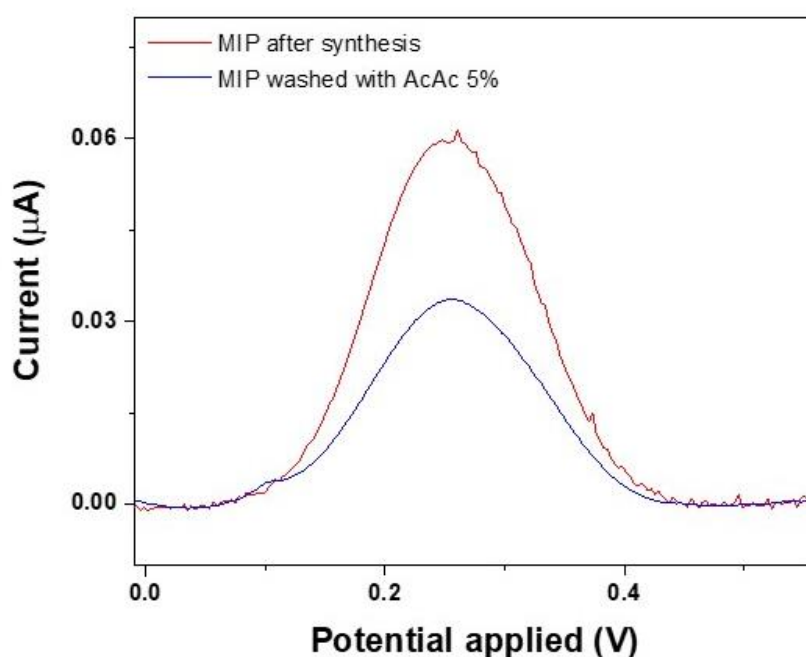

**Figure S3.** MIP response for TGF $\beta$ 1 concentration in artificial saliva samples (black spots).

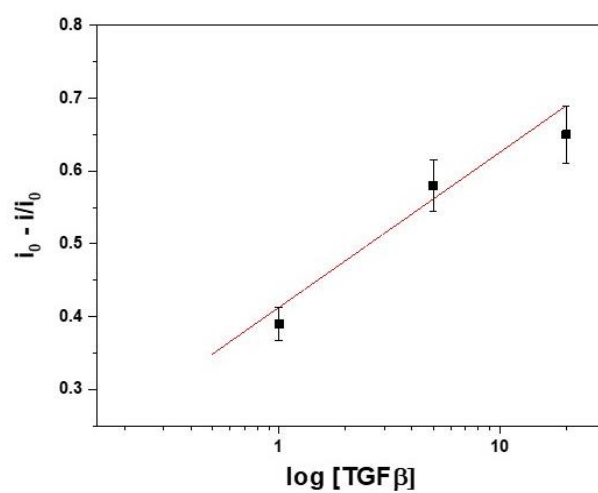

**Figure S4.** DPV characterization of TGF $\beta$ 1-MIP sensor in artificial saliva samples.

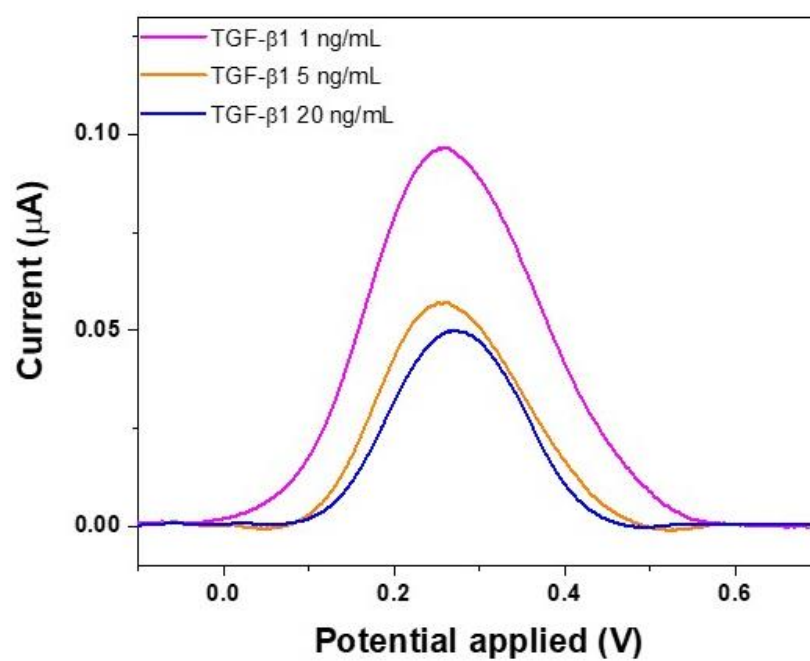

Supplement: d3an00958k1.pdf [file d3an00958k1.pdf]
